# Supplementary material for: Therapeutic evaluation of palbociclib and its compatibility with other chemotherapies for primary and recurrent nasopharyngeal carcinoma
Source: PubMed Central journal article supplement (PMC7690146; doi:10.1186/s13046-020-01763-z), 2020-11-26

# Supplementary Figure S1

A

IC50 of palbociclib in different types of cancer

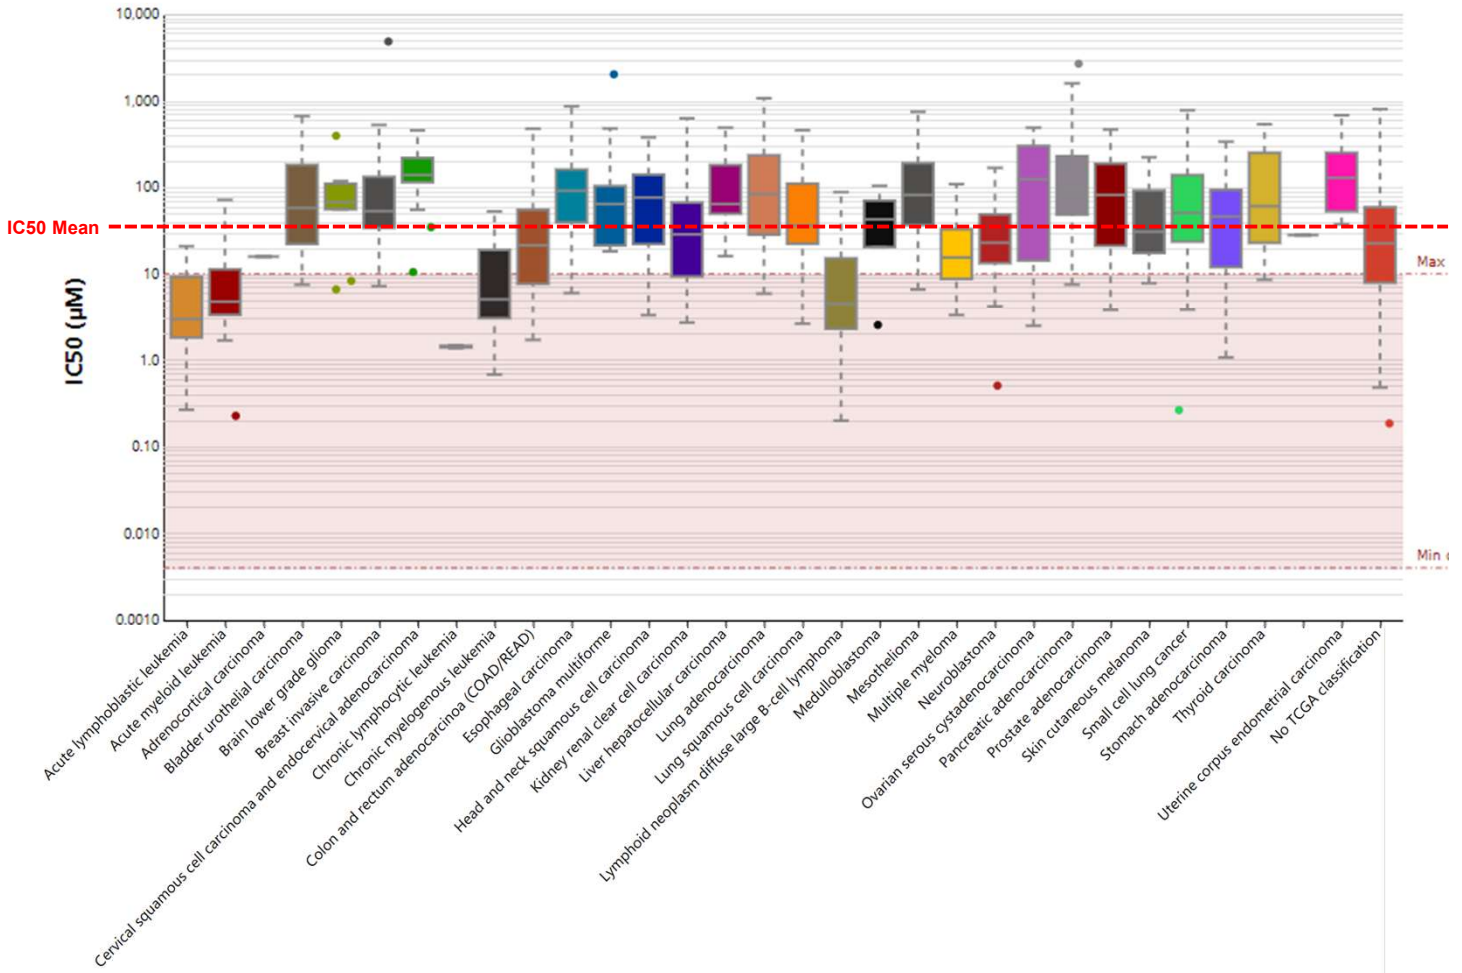

|                     | PAN cancer    | Head and Neck Cancer | Nasopharyngeal Carcinoma |       |       |
|---------------------|---------------|----------------------|--------------------------|-------|-------|
| Cell Line           | 770 cell line | 26 cell line         | C666-1                   | C17   | NPC43 |
| IC50 (µM)<br>(Day3) | 35.7          | 49.2                 | 22.36                    | 20.23 | 24.63 |

# Supplementary Figure S2

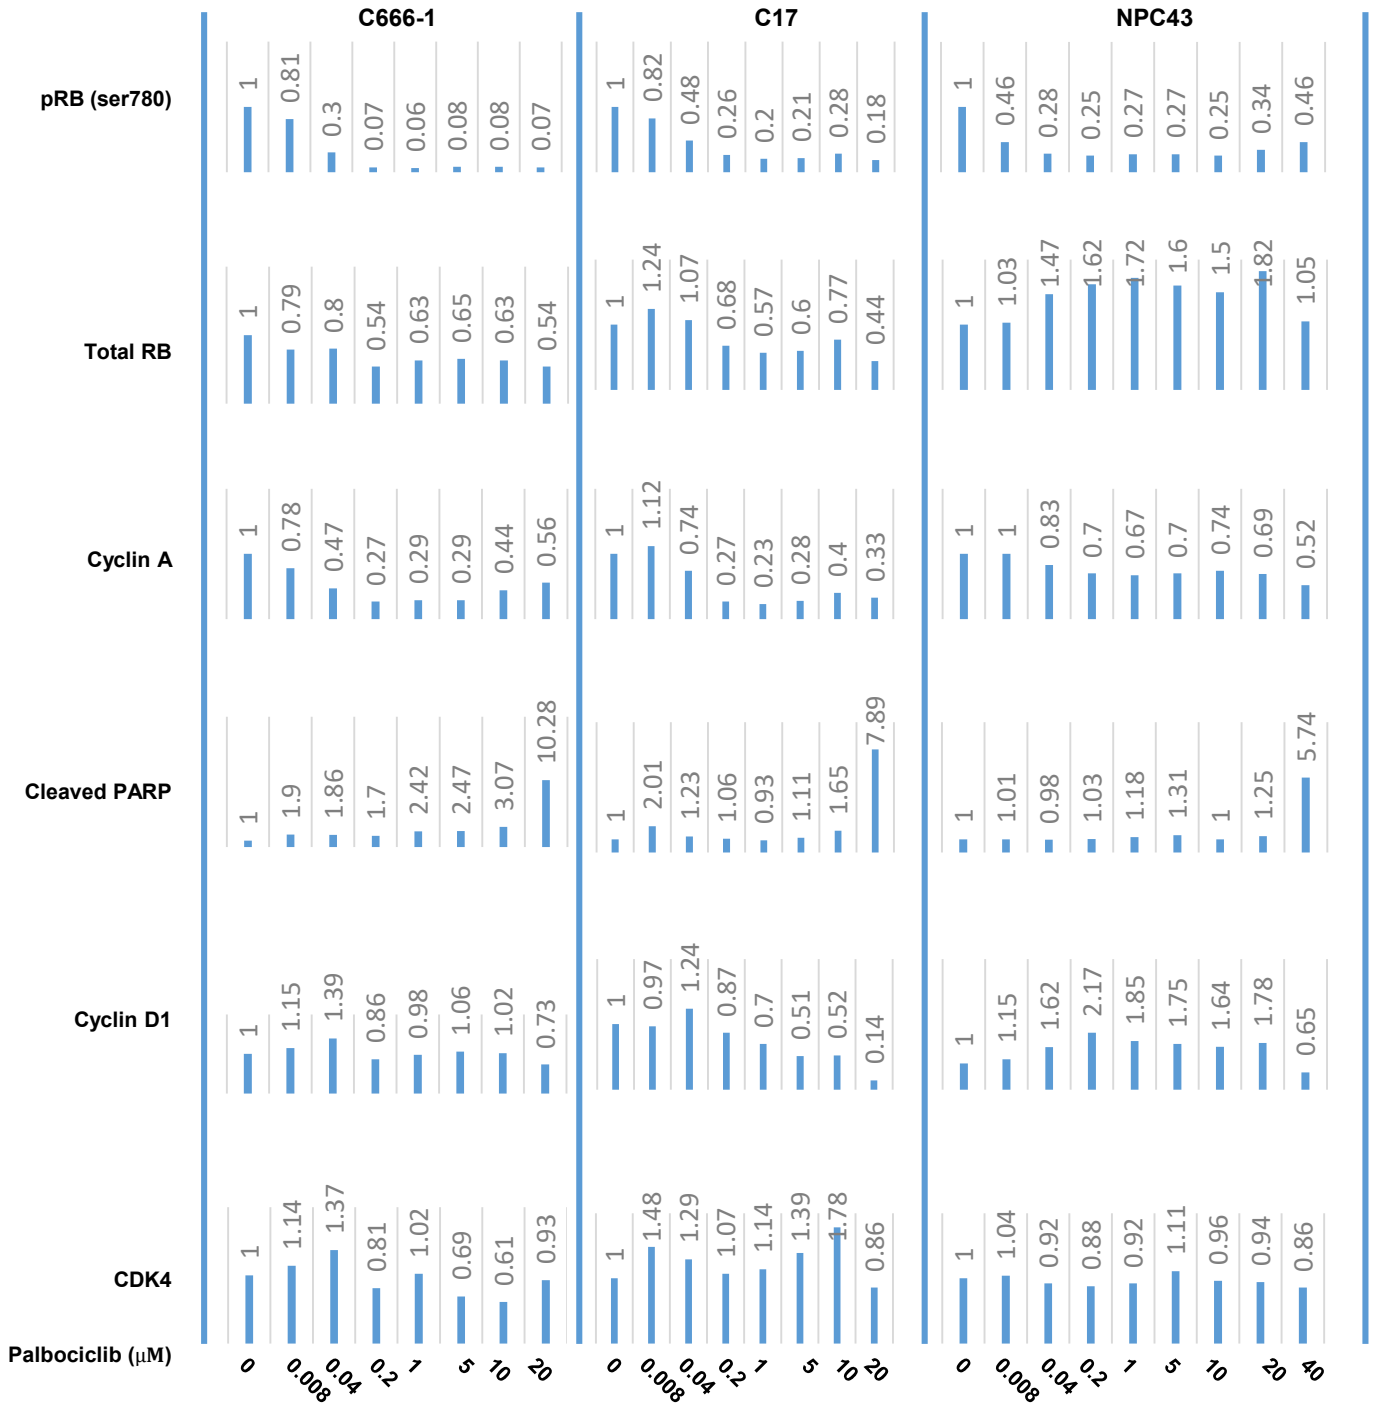

# Supplementary Figure S3

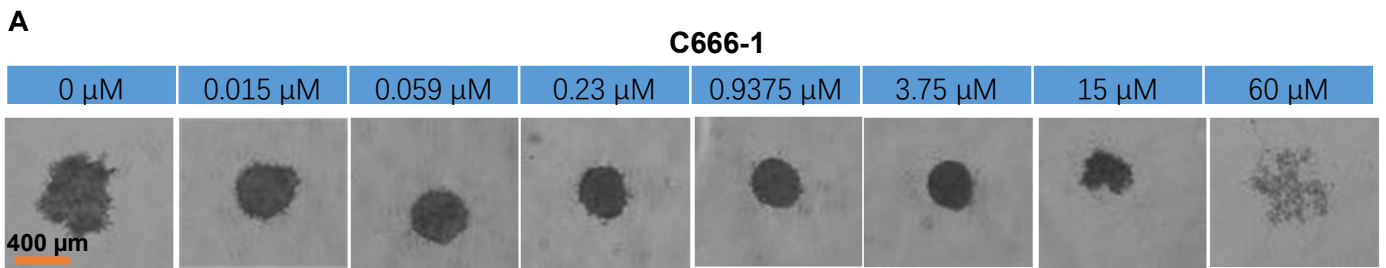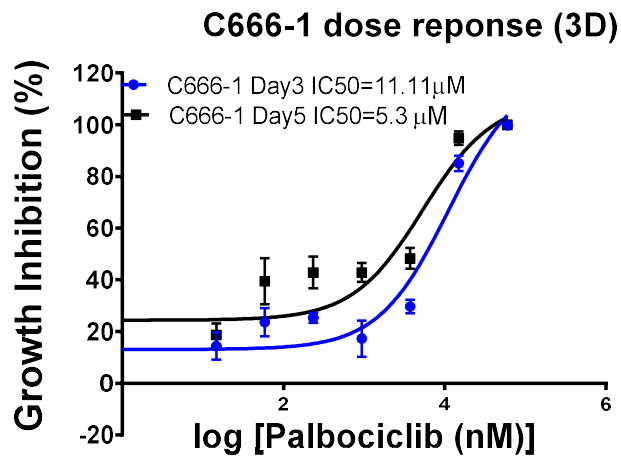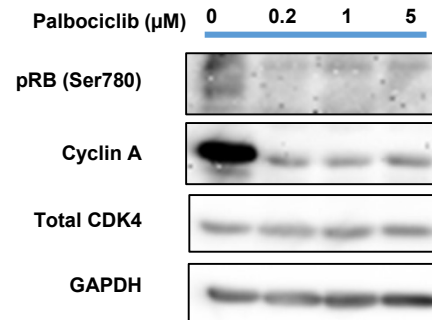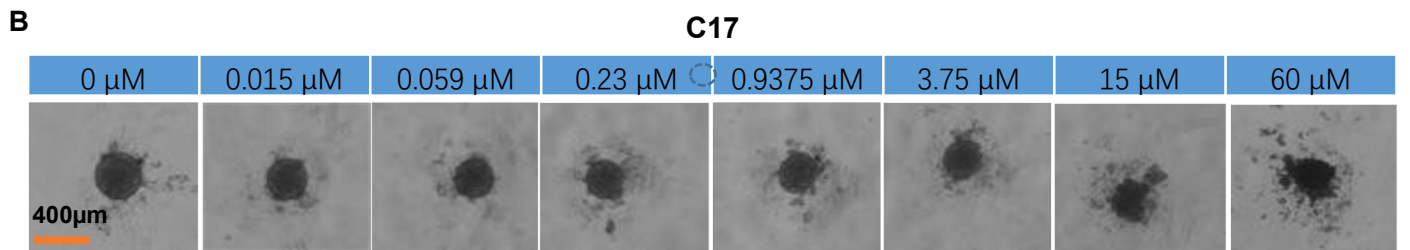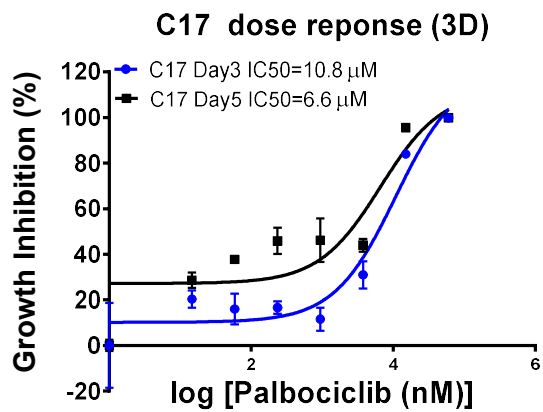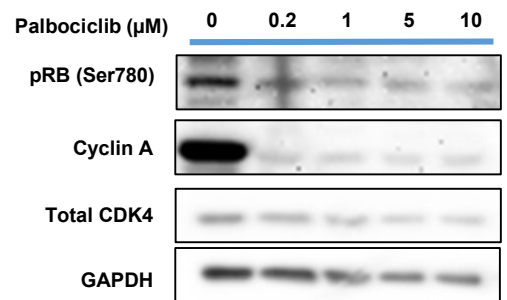

# Supplementary Figure S4

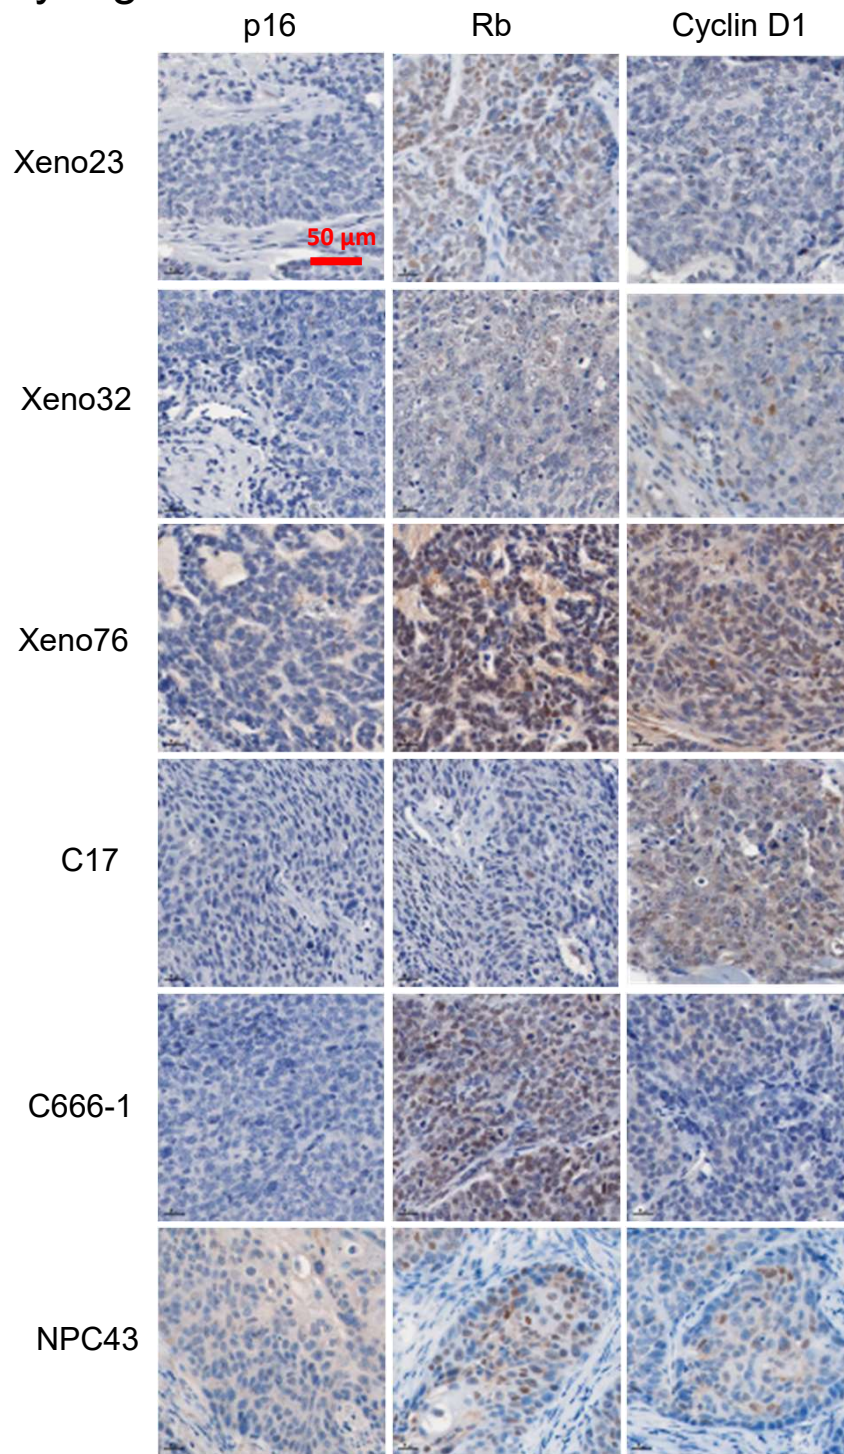

|        | <b>p16</b> | <b>Rb</b> | <b>Cyclin D1</b> |
|--------|------------|-----------|------------------|
| Xeno23 | —          | ++        | +                |
| Xeno32 | —          | +         | +                |
| Xeno76 | —          | +++       | +++              |
| C17    | —          | +         | +++              |
| C666-1 | —          | +++       | +                |
| NPC43  | —          | ++        | ++               |

# Supplementary Figure S5

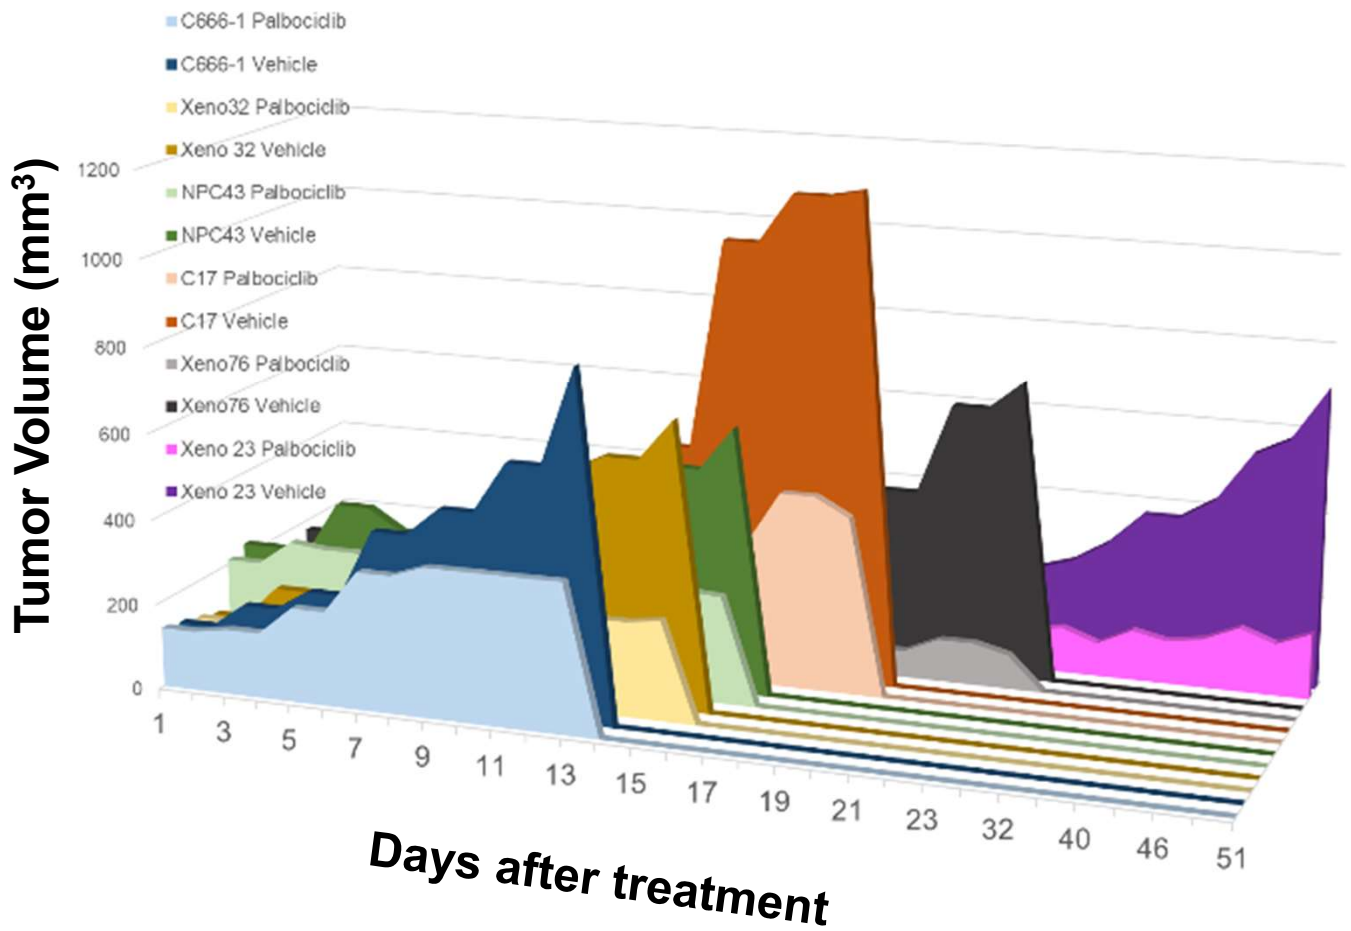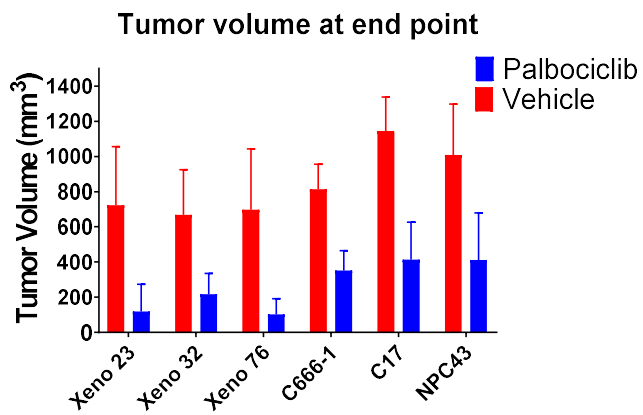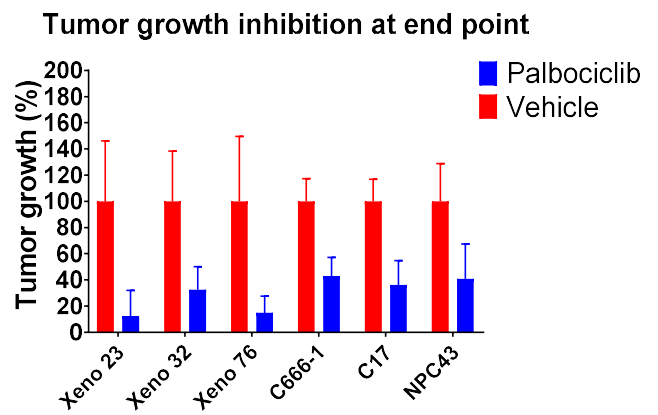



# Supplementary Figure S6

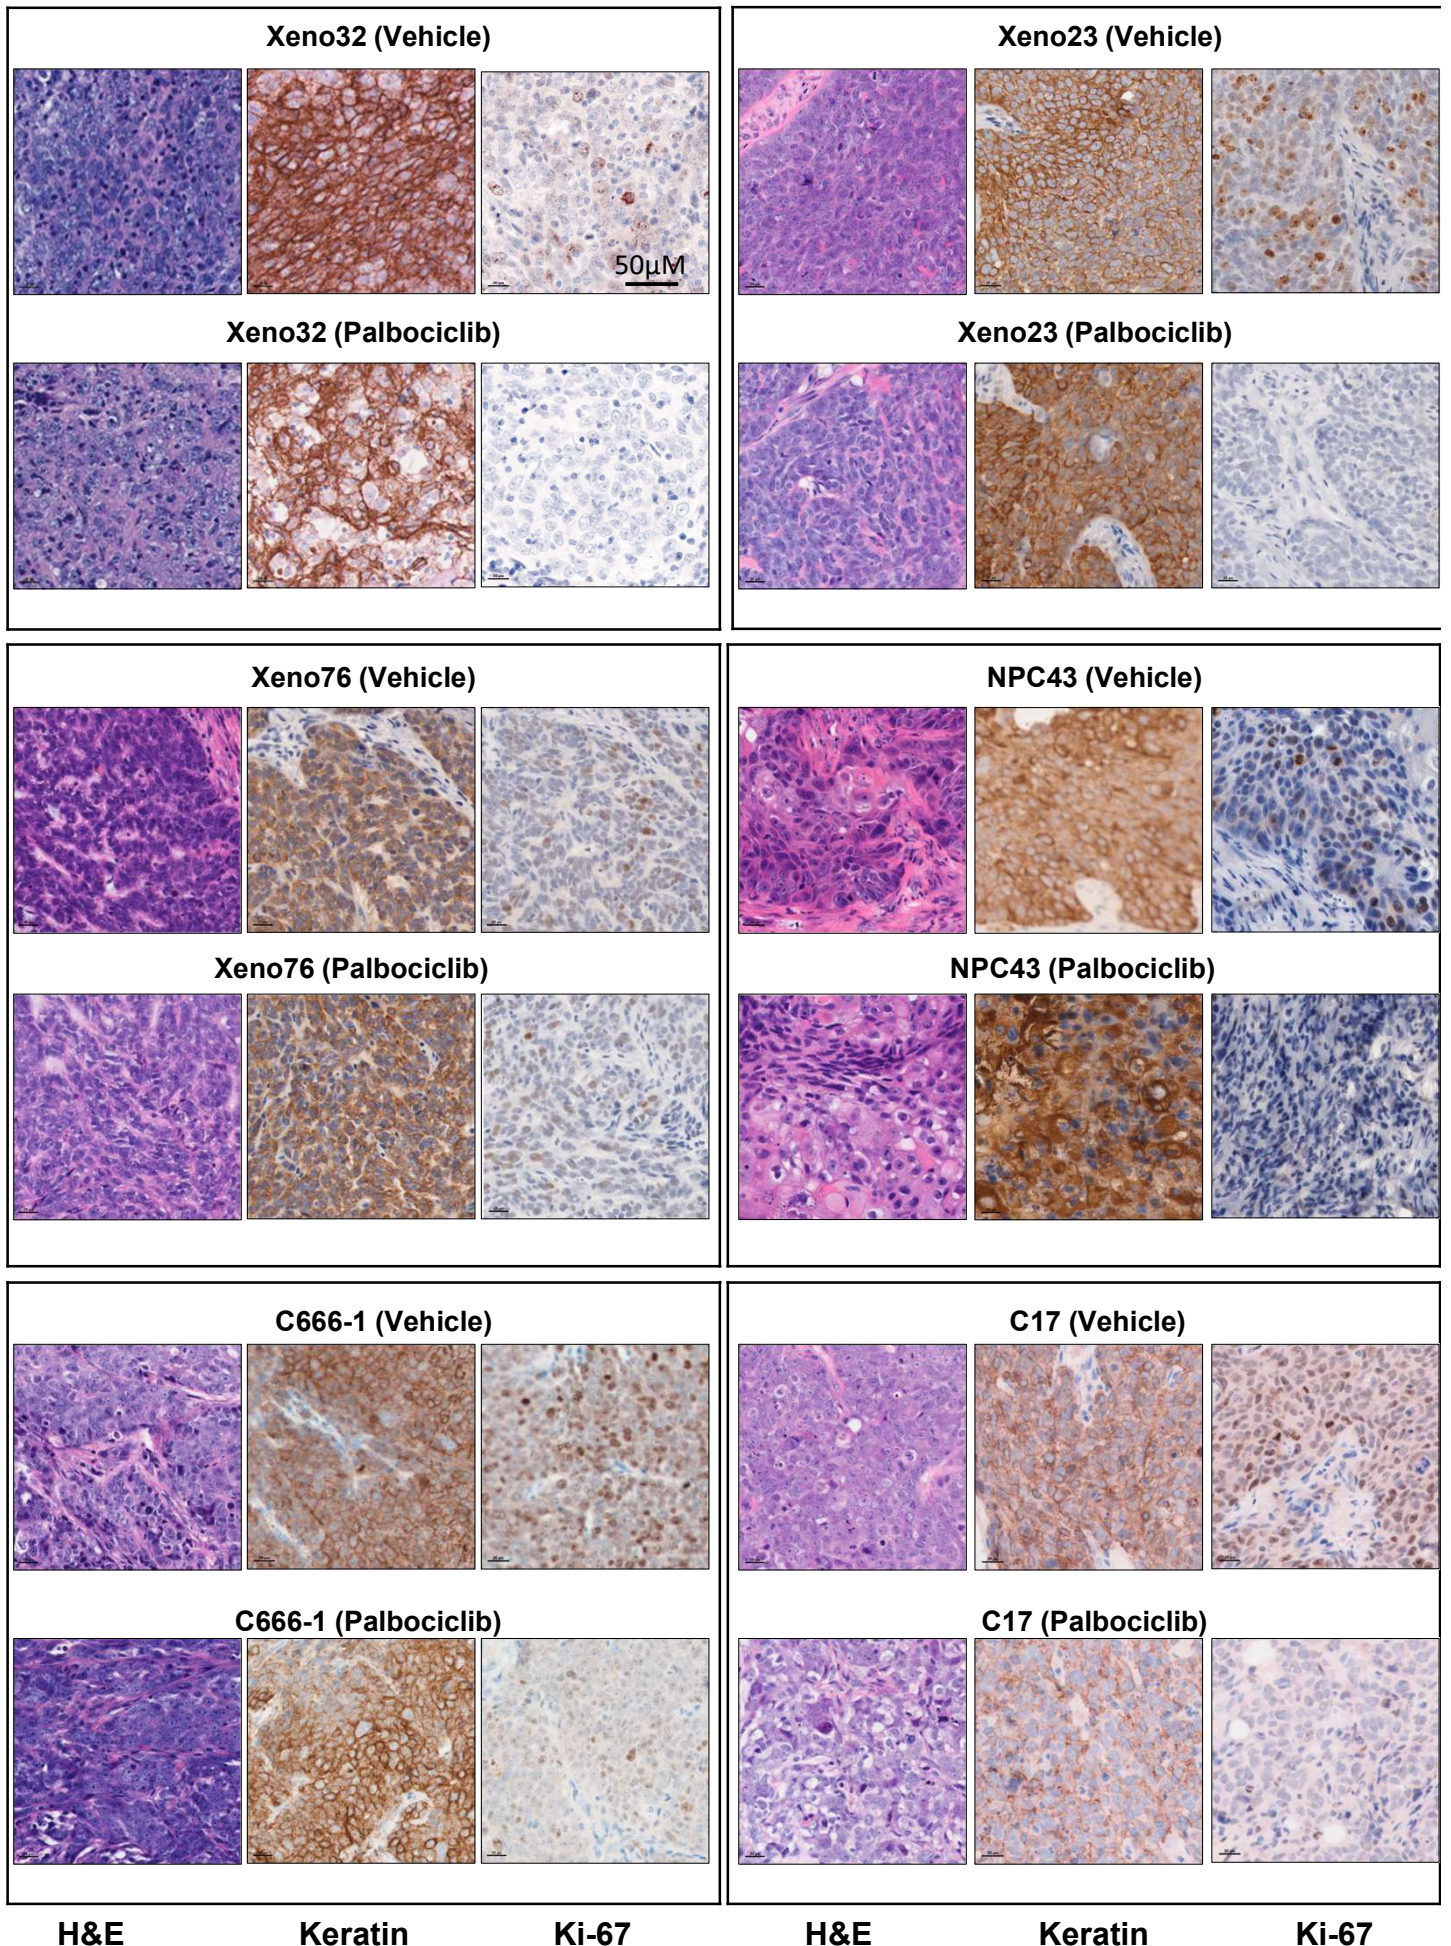



# Supplementary Figure S7

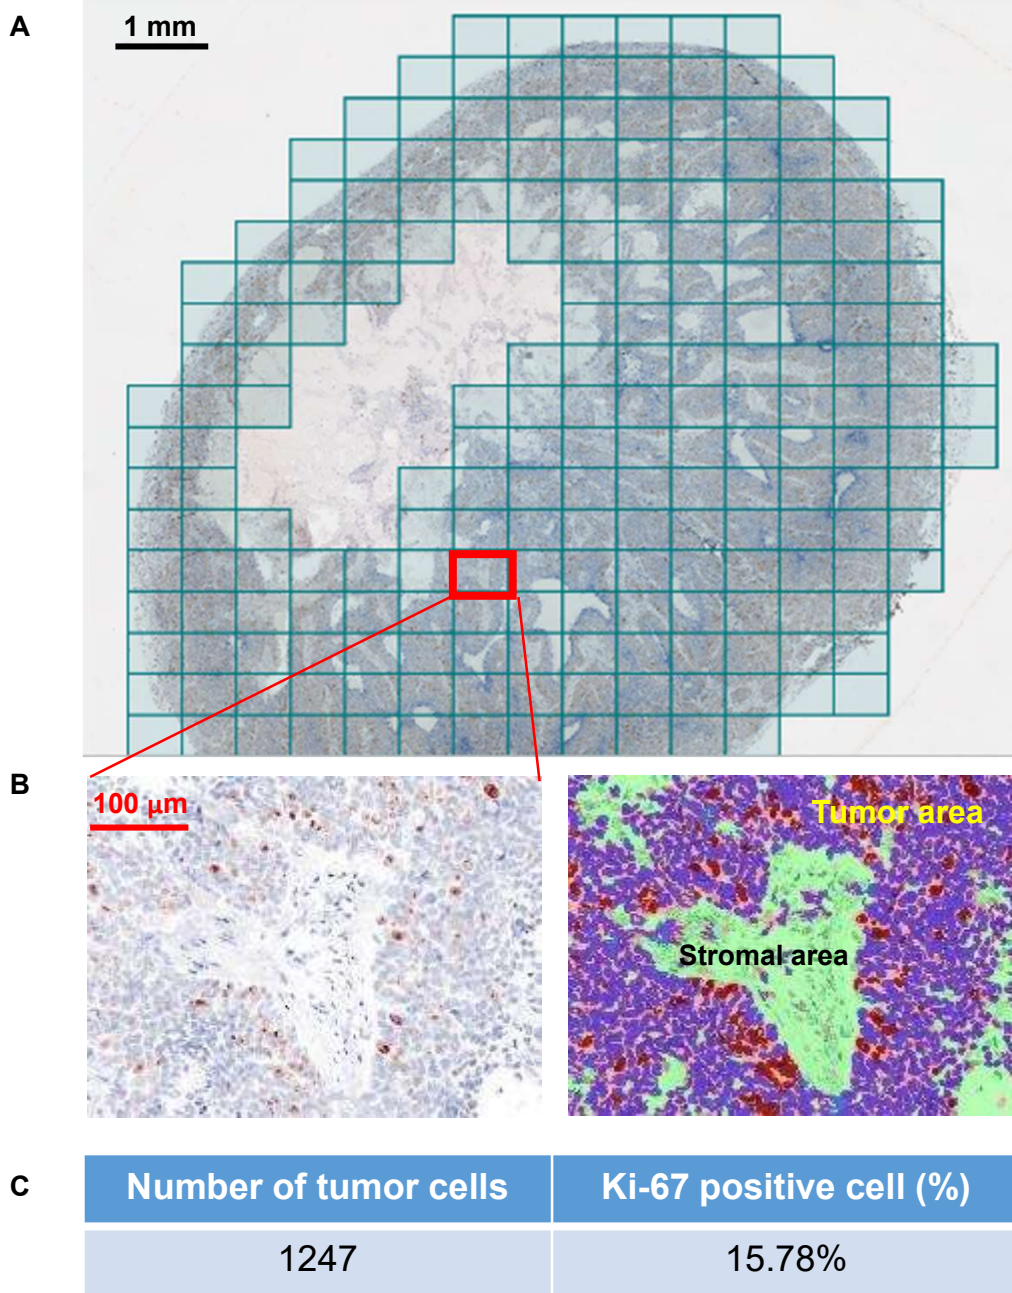

# Supplementary Figure S8

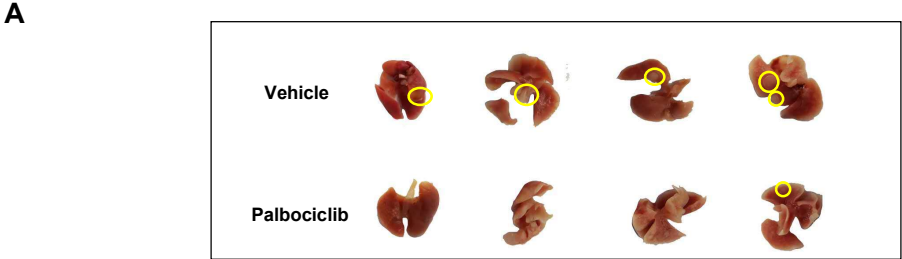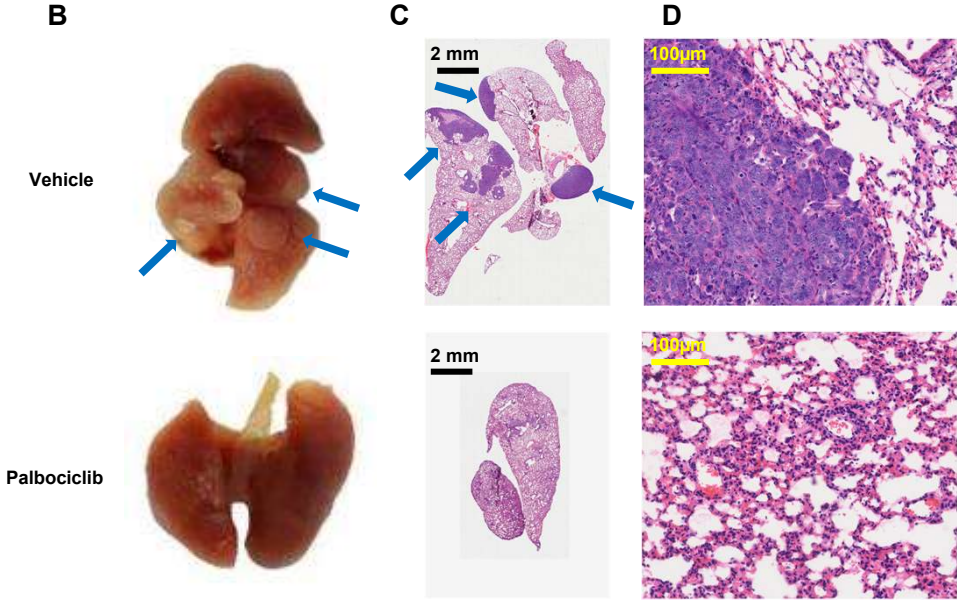



# Supplementary Figure S9

## Ki-67

Xeno23

Xeno 76

C666-1

Vehicle

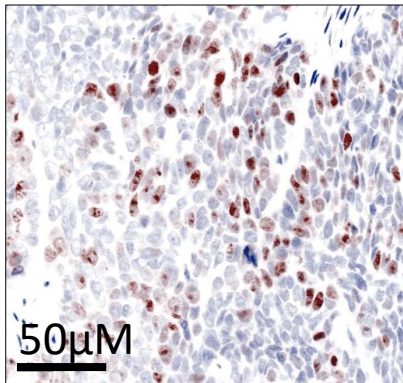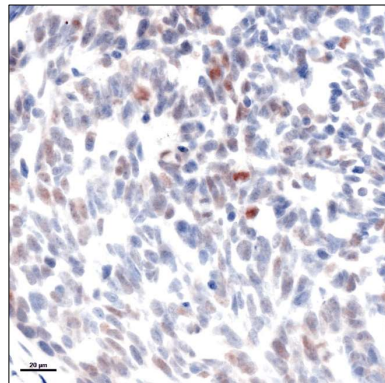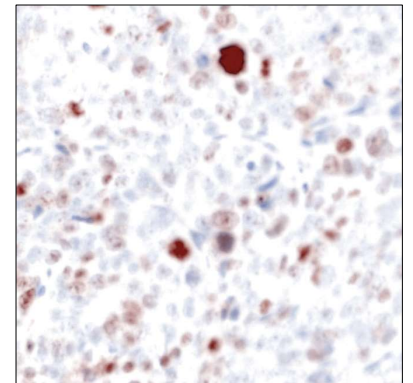

Palbociclib

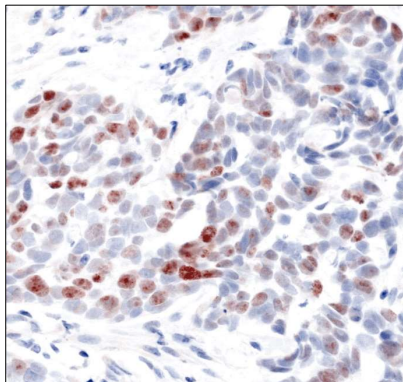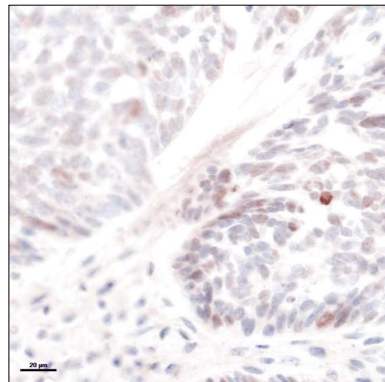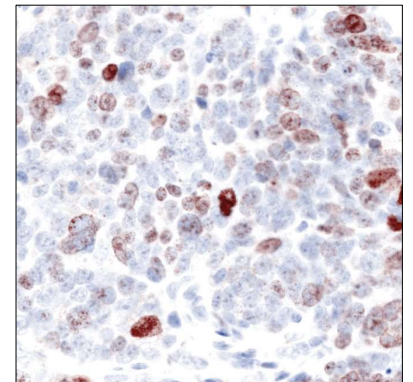

SAHA

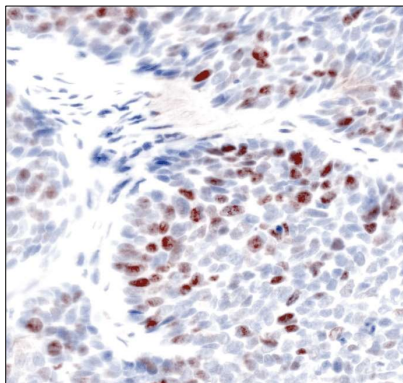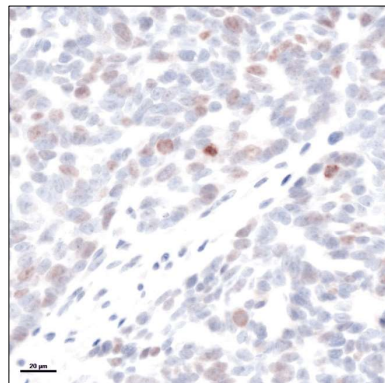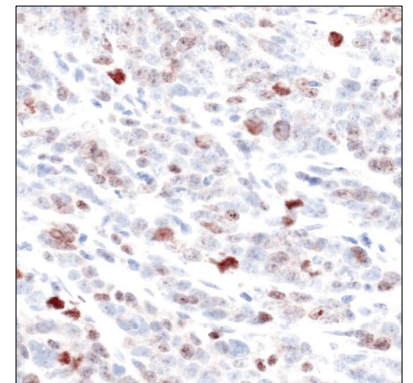

Combination

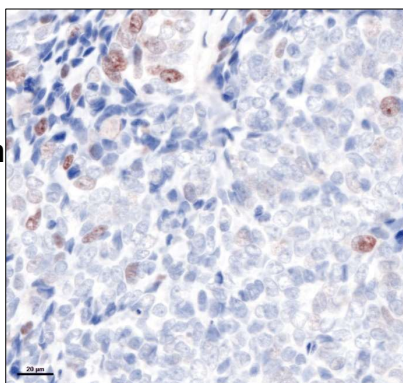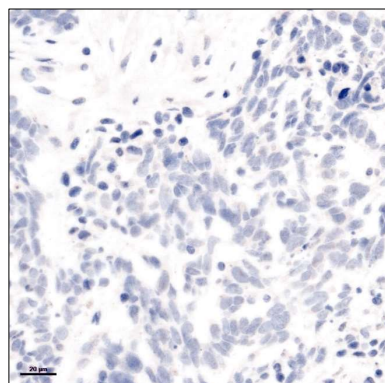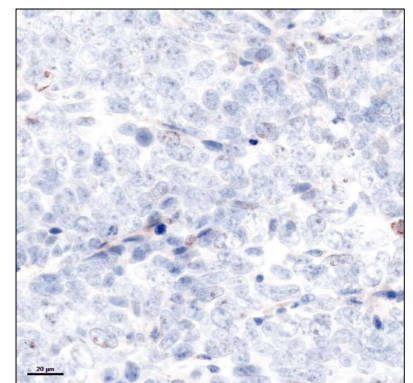

# Supplementary Figure S10

## Xeno23

Vehicle

Combination

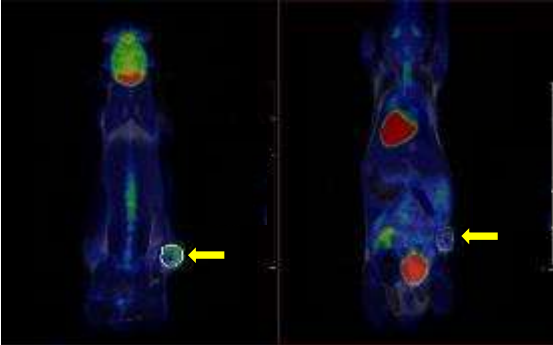

| Xeno23  | SUV mean<br>(Normalized by liver metabolism) |
|---------|----------------------------------------------|
| Vehicle | 0.76                                         |
| PD+SAHA | 0.09                                         |

# Supplementary Figure S11

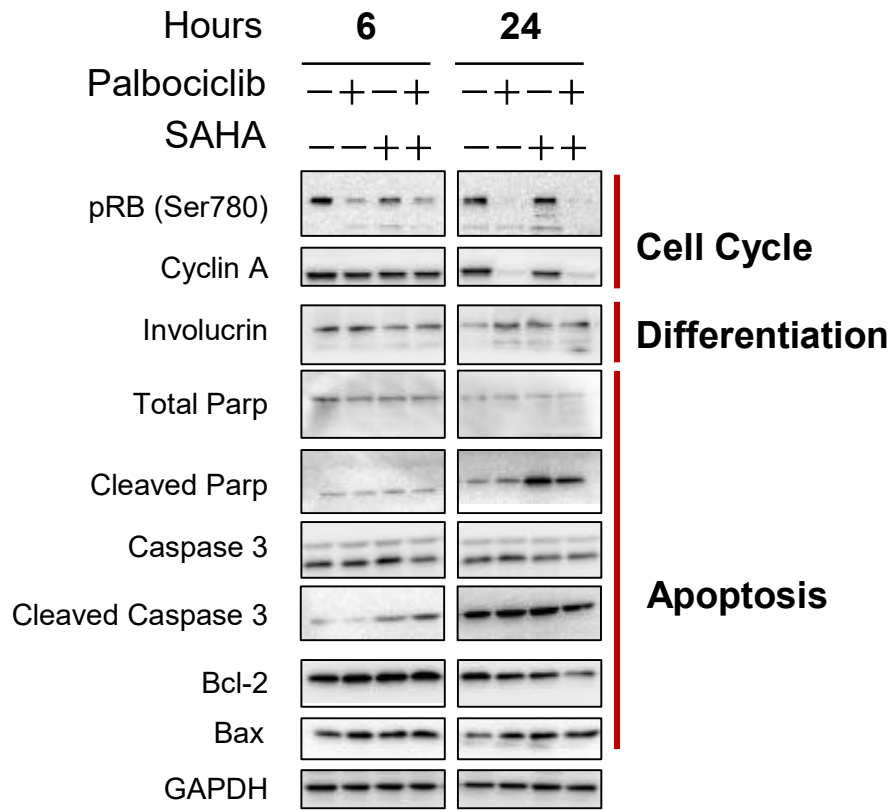



# Supplementary Figure S12

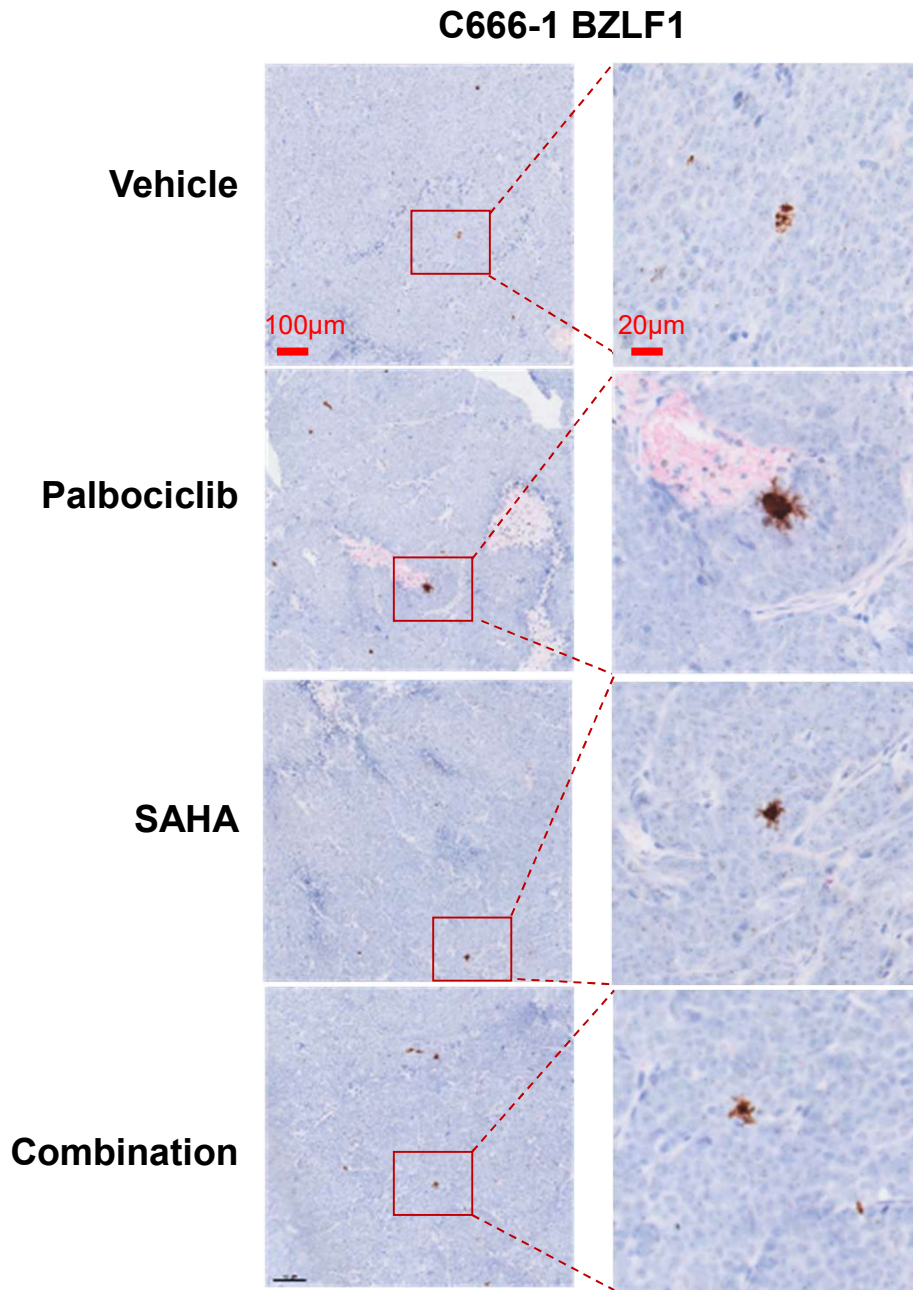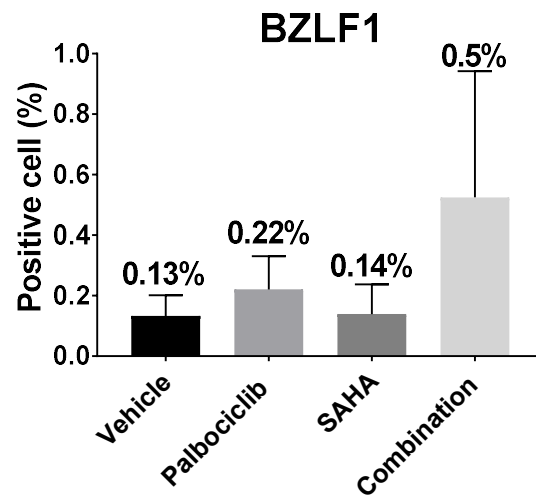

# Supplementary Figure S13

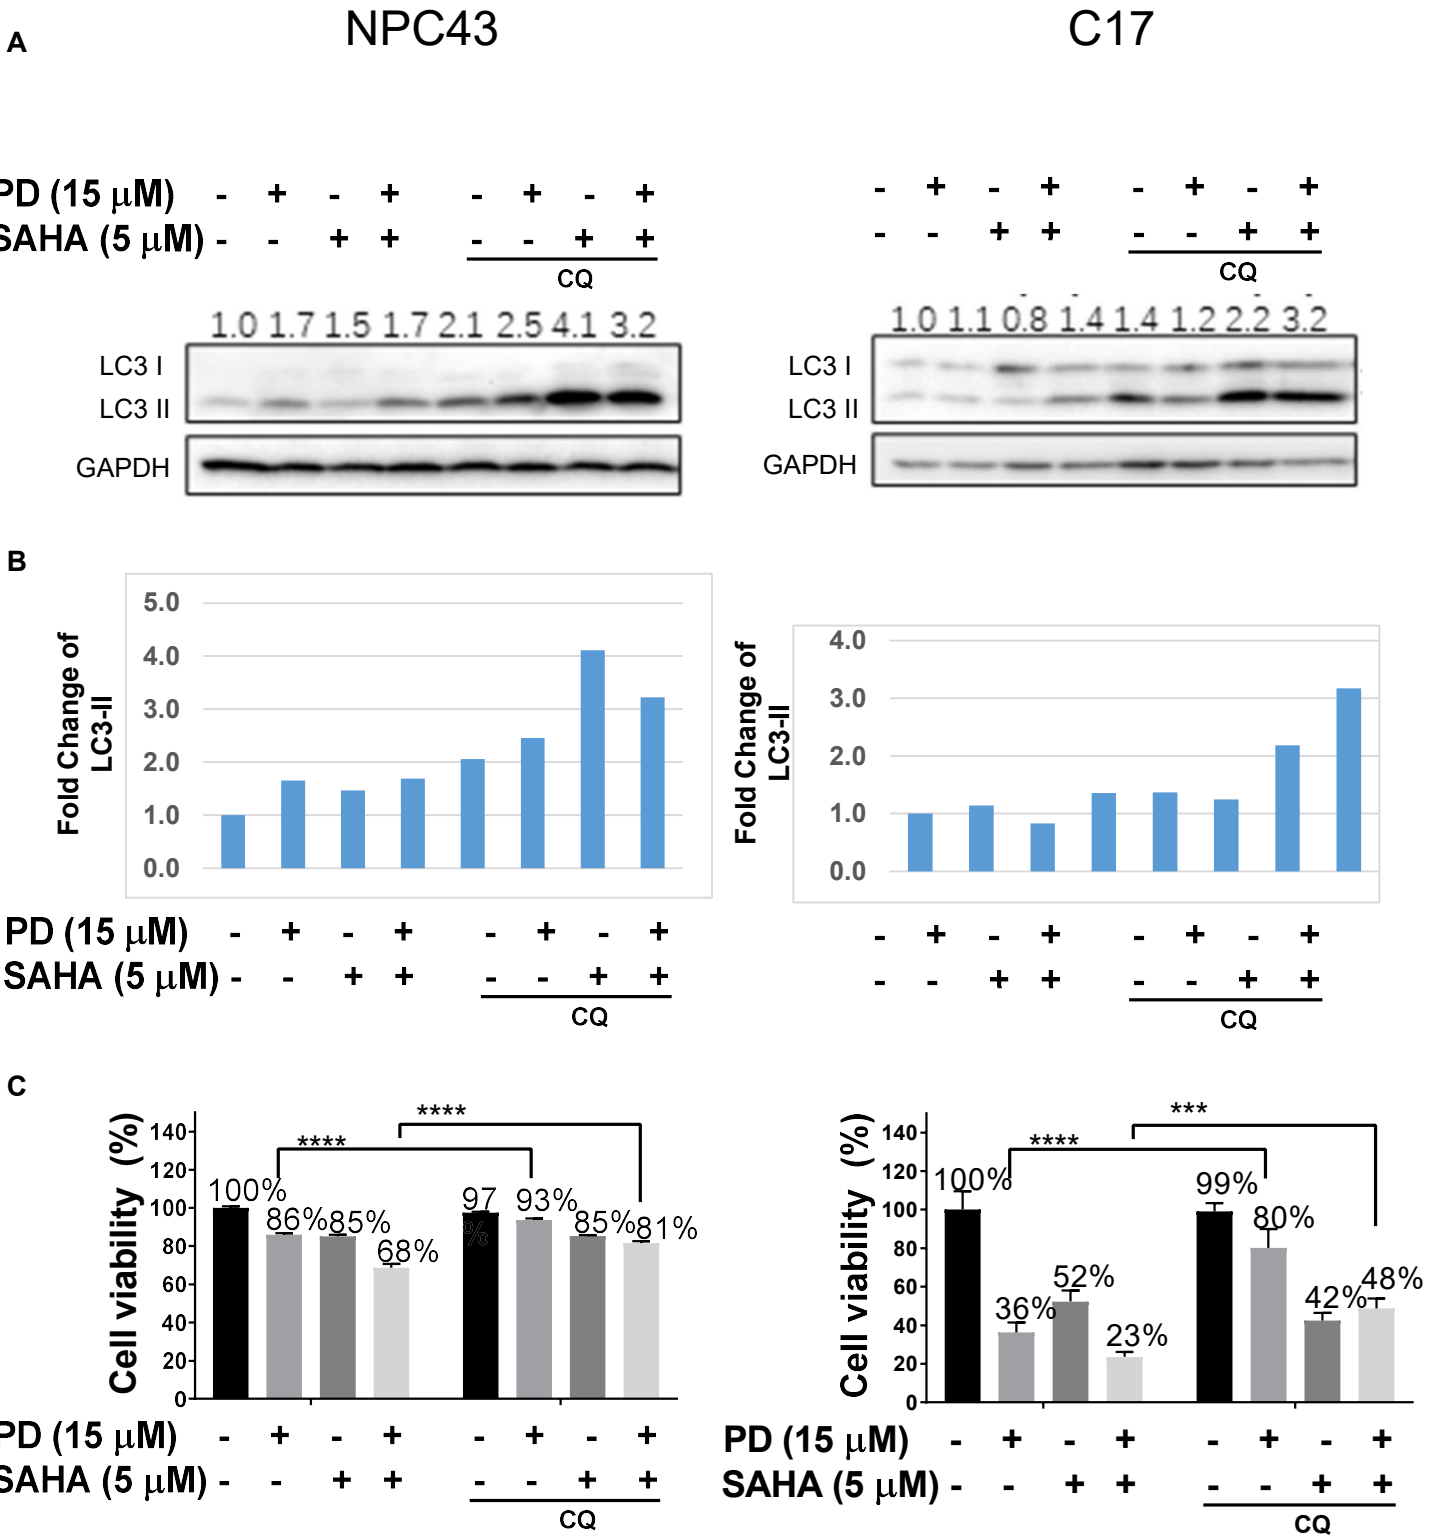

# Supplementary Figure S14

A

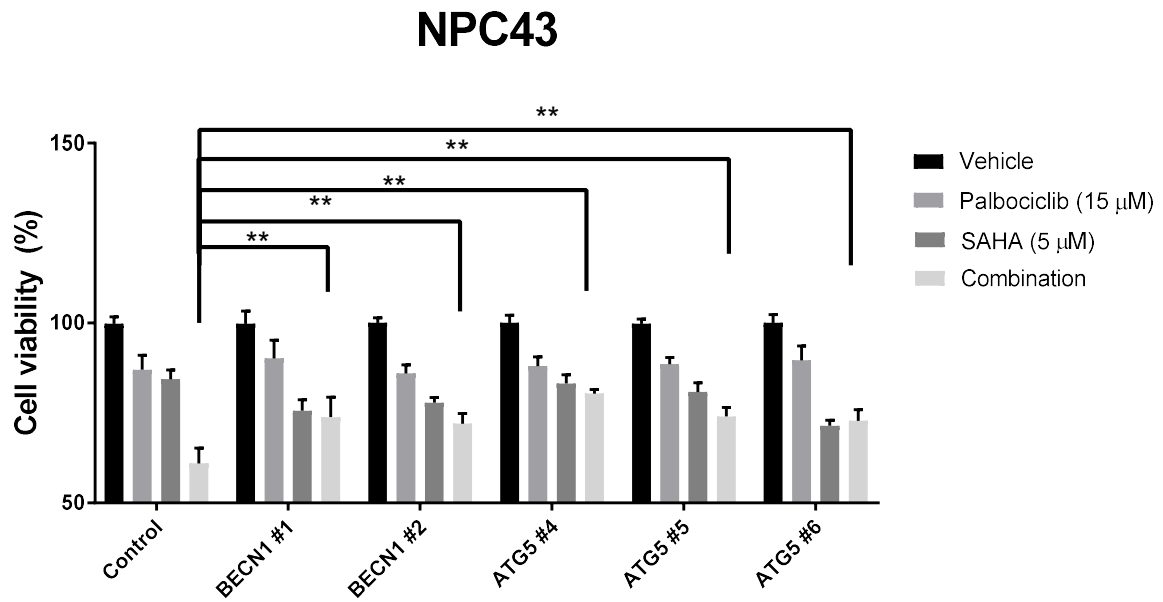

B

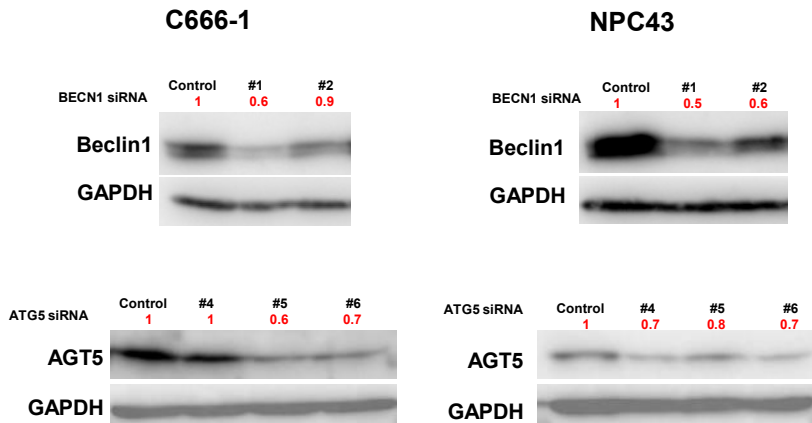



# Supplementary Figure S15

## NPC43

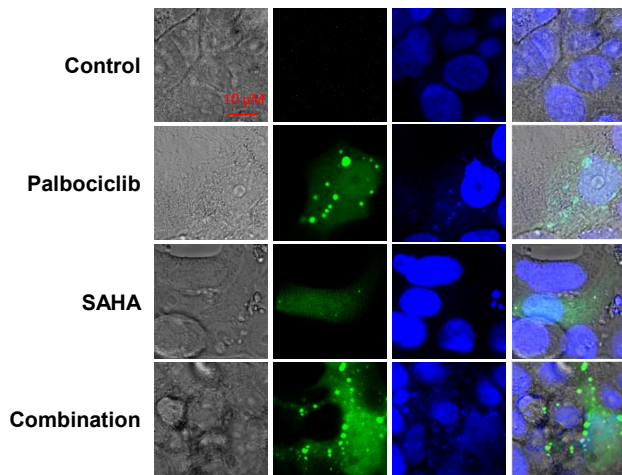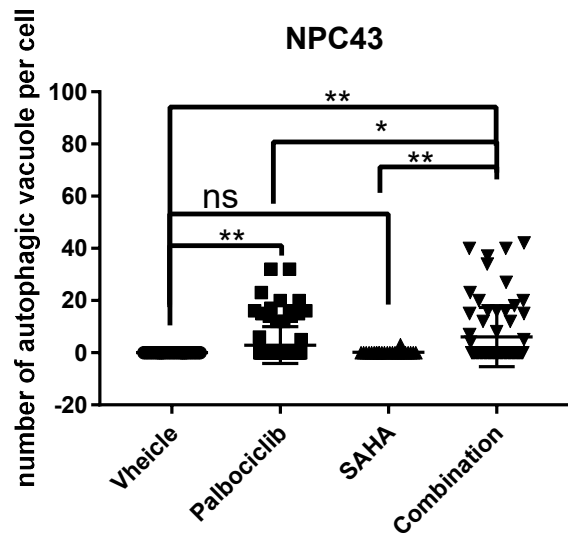

## C666-1

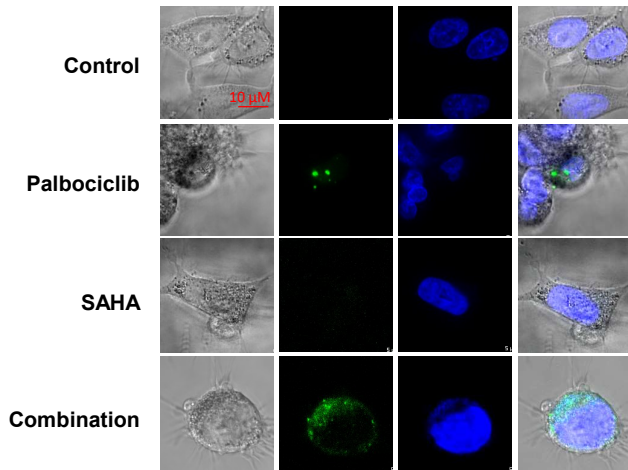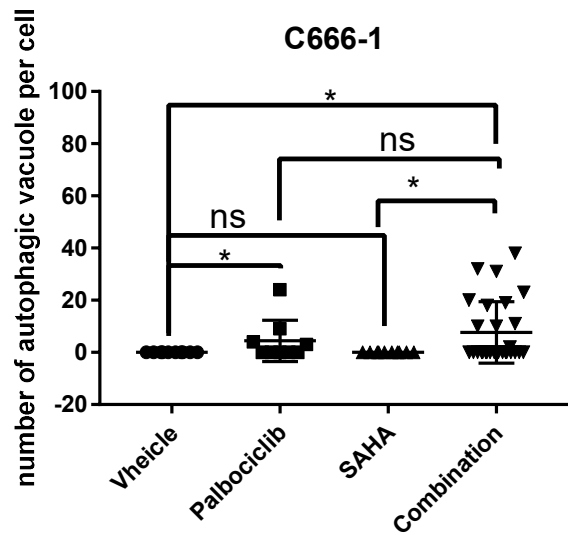

## C17

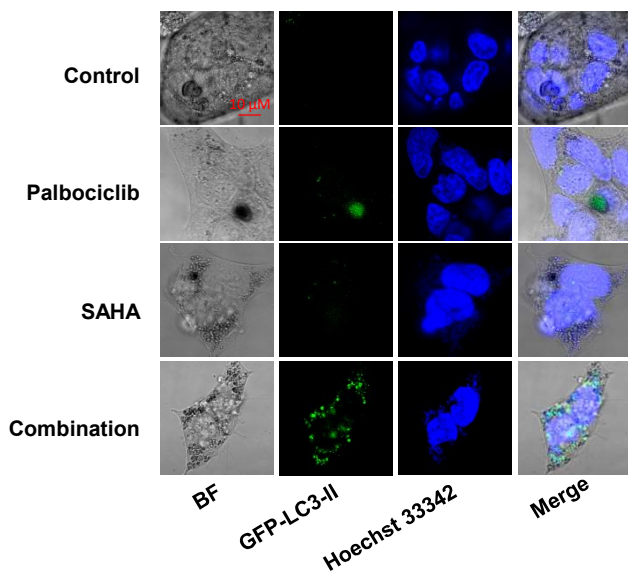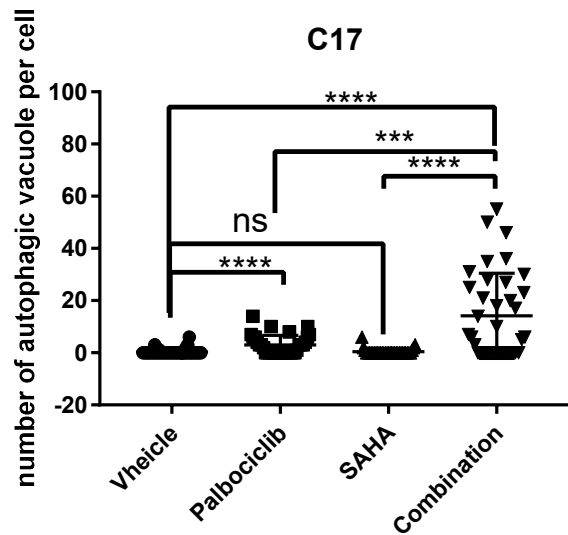

Supplement: 13046_2020_1763_MOESM1_ESM.pdf [file 13046_2020_1763_MOESM1_ESM.pdf]
